# Supplementary material for: Pre-existing immune status associated with response to combination of sipuleucel-T and ipilimumab in patients with metastatic castration-resistant prostate cancer
Source: PubMed Central journal article supplement — J Immunother Cancer. 2021 May 13;9(5):e002254. doi: 10.1136/jitc-2020-002254 (PMC8126308; doi:10.1136/jitc-2020-002254), 2021-05-13
Supplement: jitc-2020-002254supp001.pdf [file jitc-2020-002254supp001.pdf]

**Supplementary Table 1. Univariate analysis with rPFS**

|                         | HR (95% CI)       | <i>p</i> value |
|-------------------------|-------------------|----------------|
| Race                    | 0.77 (0.27, 2.22) | 0.633          |
| Ethnicity               | 1.85 (0.54, 6.40) | 0.328          |
| Gleason Score >7        | 0.98 (0.52, 1.85) | 0.948          |
| ECOG 0                  | 3.77 (1.54, 9.23) | 0.004          |
| Age                     | 0.96 (0.92, 1.01) | 0.092          |
| PSA                     | 1.01 (1.01, 1.02) | 0.001          |
| Alkaline Phosphatase    | 1.01 (1.00, 1.01) | 0.273          |
| Hemoglobin              | 1.61 (1.02, 2.54) | 0.039          |
| LDH                     | 1.00 (1.00, 1.00) | 0.404          |
| Prior Radiation Therapy | 0.34 (0.16, 0.73) | 0.006          |
