# Supplementary figures and images for: Pre-existing immune status associated with response to combination of sipuleucel-T and ipilimumab in patients with metastatic castration-resistant prostate cancer
Source: PubMed Central journal article supplement — J Immunother Cancer. 2021 May 13;9(5):e002254. doi: 10.1136/jitc-2020-002254 (PMC8126308; doi:10.1136/jitc-2020-002254), 2021-05-13

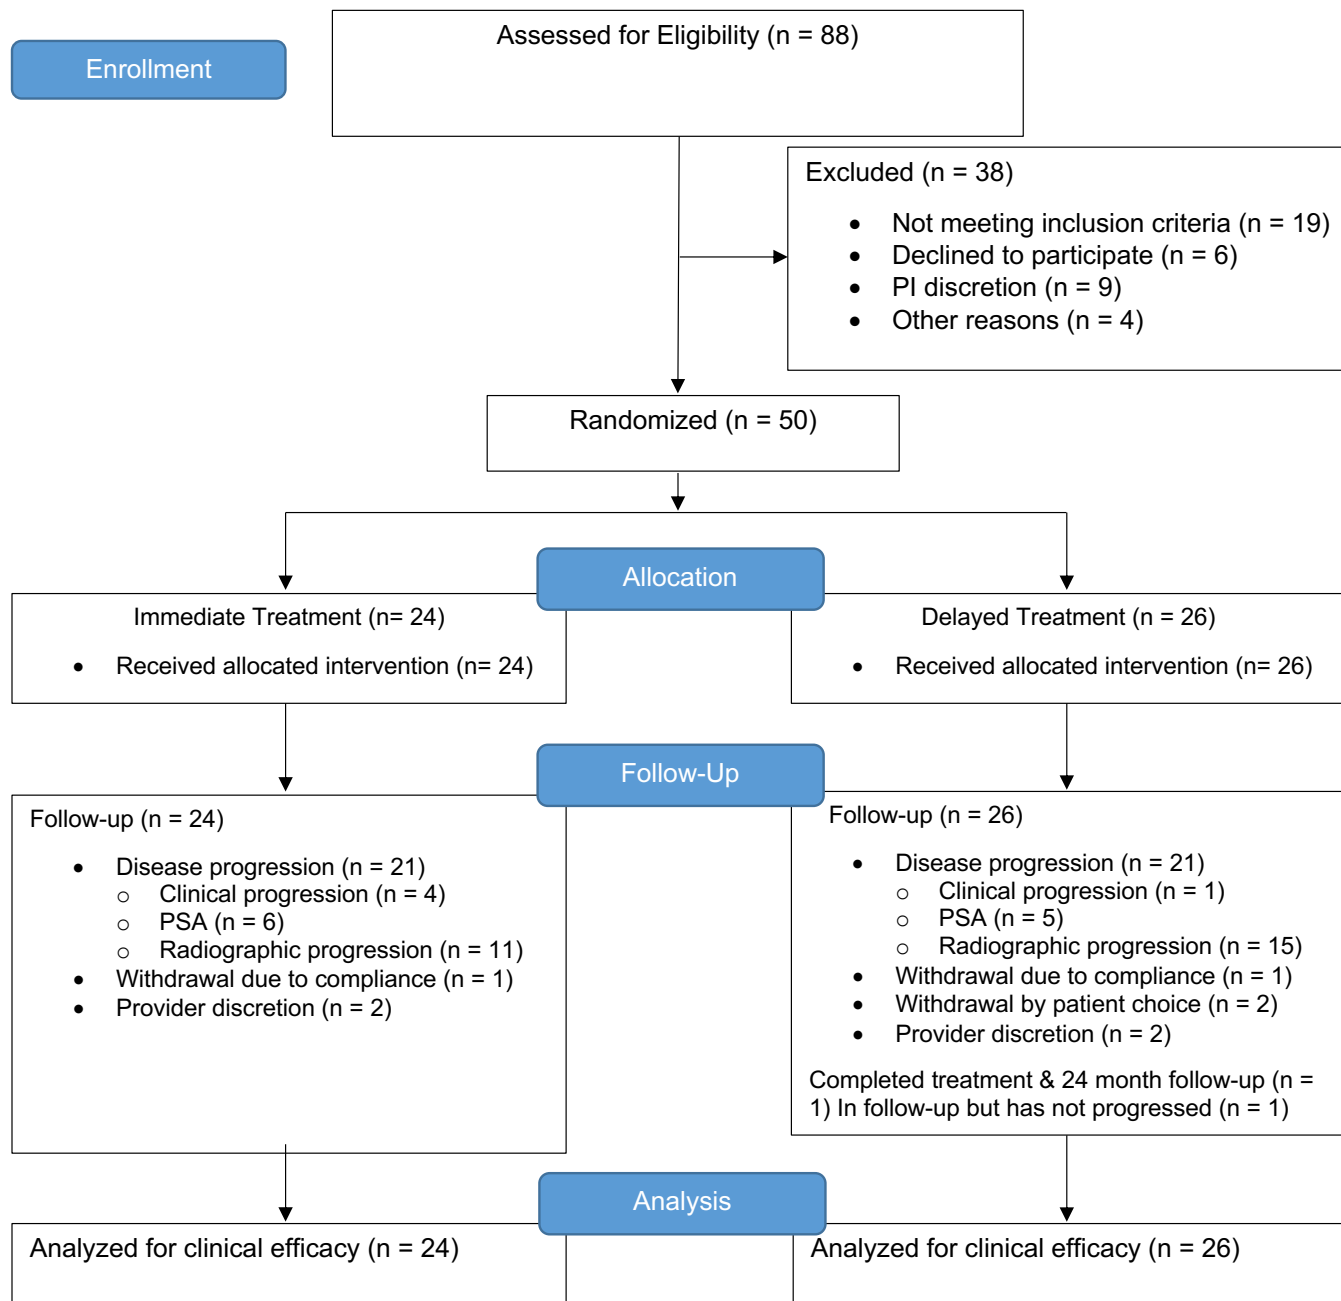

Supplement: jitc-2020-002254supp003.pdf [file jitc-2020-002254supp003.pdf]

**Supplementary Figure 3**

Arms

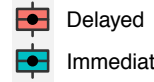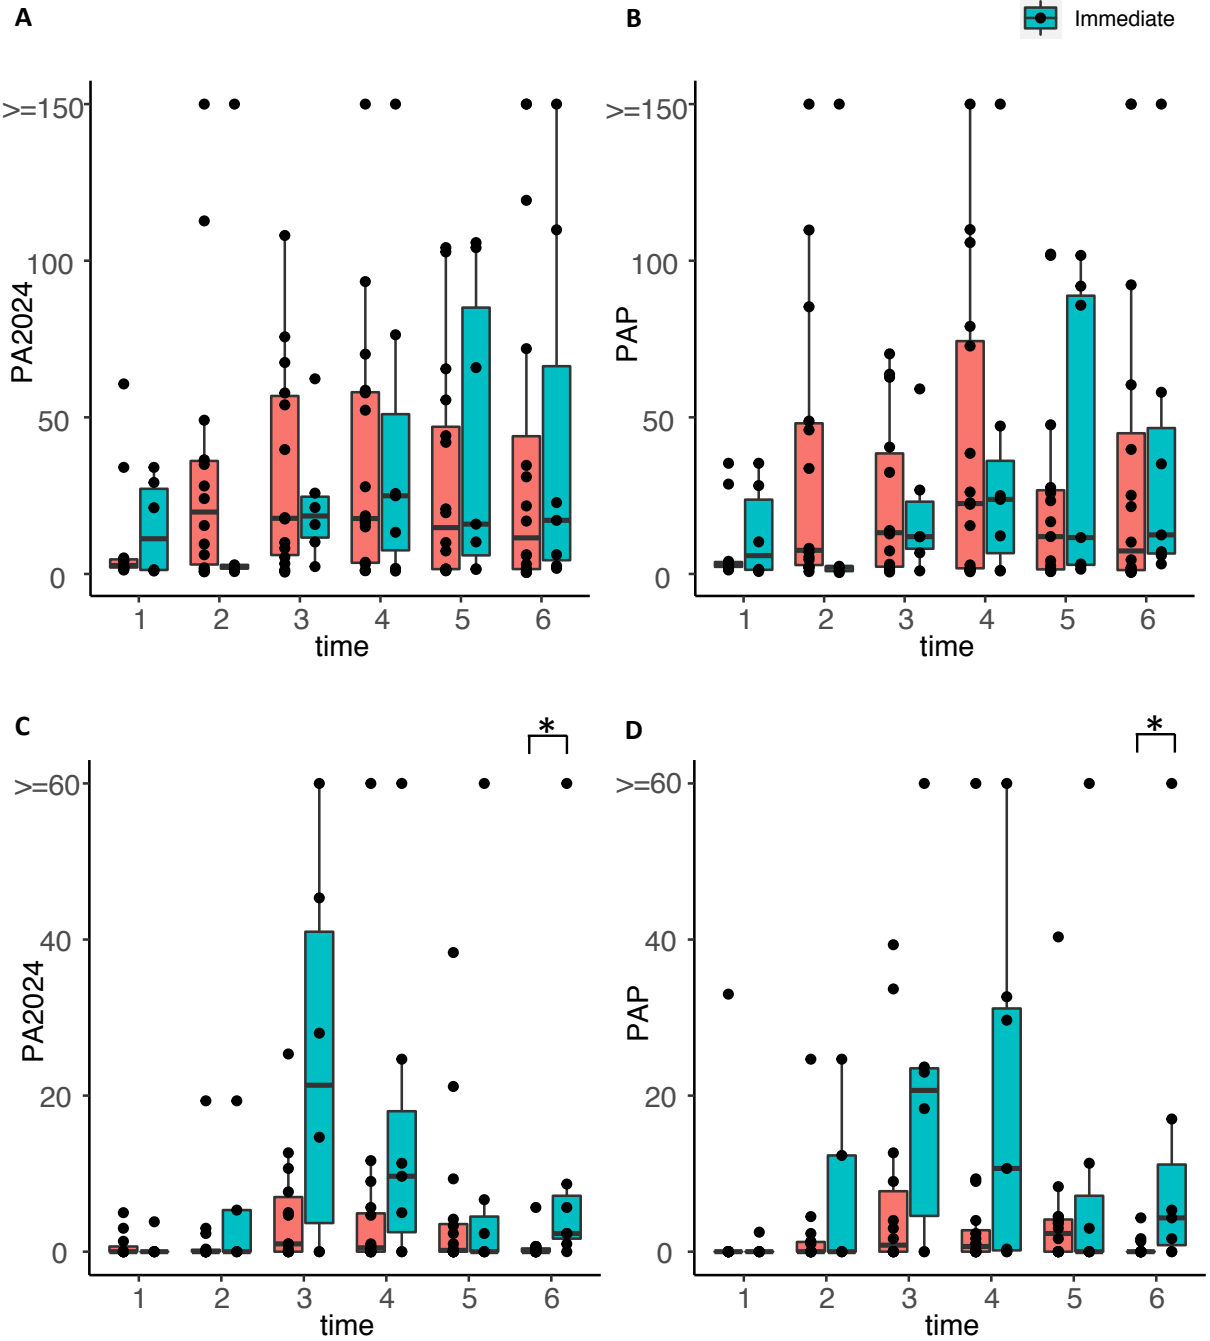

Supplement: jitc-2020-002254supp004.pdf [file jitc-2020-002254supp004.pdf]

### Supplementary Figure 5

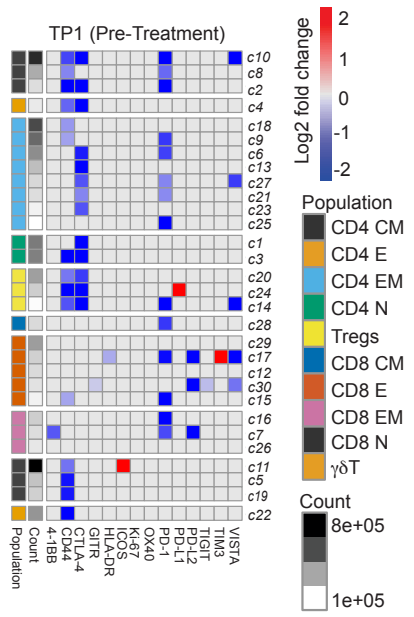

Supplement: jitc-2020-002254supp006.pdf [file jitc-2020-002254supp006.pdf]
